# Supplementary material for: Fast detection of hypobromous acid in cells and the water environment using a lysosome-targeted fluorescent probe
Source: Royal Society of Chemistry journal article supplement (doi:10.1039/d3ob01952g), 2024-01-01
Supplement: d3ob01952g1.pdf [file d3ob01952g1.pdf]

# Fast detection of hypobromous acid in cells and water environment by a lysosome-targeted fluorescent probe

Quan-Rong Du<sup>†</sup>, Min Peng<sup>†</sup>, Yang Tian, Xue Yao, Jianfeng Zheng, Yu Peng\* and  
Ya-Wen Wang\*

School of Chemistry & School of Life Science and Engineering, Southwest Jiaotong  
University, Chengdu 610031, People's Republic of China

pengyu@swjtu.edu.cn, ywwang@swjtu.edu.cn

## Table of Contents

|                                                                                                |     |
|------------------------------------------------------------------------------------------------|-----|
| 1. General information .....                                                                   | S2  |
| 2. Summary of the fluorescent probes for HBrO.....                                             | S4  |
| 3. Synthesis of <b>SWJT-23</b> (Scheme S1) .....                                               | S7  |
| 4. <sup>1</sup> H, <sup>13</sup> C NMR, and MS spectra of <b>SWJT-23</b> (Figures S1-S4) ..... | S8  |
| 5. The pH effect of <b>SWJT-23</b> and <b>SWJT-23</b> + HBrO (Figure S5) .....                 | S10 |
| 6. The stability of <b>SWJT-23</b> and <b>SWJT-23</b> + HBrO (Figure S6) .....                 | S11 |
| 7. The detection limit of <b>SWJT-23</b> to HBrO (Figure S7) .....                             | S12 |
| 8. ESI-MS spectra of <b>SWJT-HBrO</b> (Figure S8) .....                                        | S13 |
| 9. Application of <b>SWJT-23</b> in water samples (Figure S9) .....                            | S14 |
| 10. Cell viability of <b>SWJT-23</b> (Figure S10) .....                                        | S15 |

## 1. General information.

4-Bromo-1,8-naphthalic anhydride, methylene glycol monomethylether, N-(2-aminoethyl)-morpholine, N,N-diisopropylethylamine and other reagents were purchased from Innochem Technology Co., Ltd. All the chemicals we used in experiment were analytical reagent grade.

$^1\text{H}$  and  $^{13}\text{C}$  NMR spectra were recorded on a Bruker AVB-400 spectrometer using TMS as the internal reference. ESI-MS spectra were acquired on Agilent Infinity Lab LC/MSD. HRMS (ESI) spectra were measured with a Waters e2695 spectrometer. The fluorescence spectra were obtained by Hitachi F-7000 spectrofluorometer with the excitation and emission slit widths at 5/2.5 nm. The absorption spectra were obtained by AOE A360 UV-Vis spectrophotometer. Fluorescence imaging of HBrO in HeLa cells was performed by Nikon AR1+ confocal microscope.

The solution of **SWJT-23** (1.0 mM) was prepared in DMSO for subsequent detection. HBrO was prepared by using 1.16g of NaOH dissolved in 10 mL ultrapure water and 386.66  $\mu\text{L}$  of liquid bromine in an ice bath. The concentration of HBrO was calculated by Lambert-Beer's law ( $E_{329} = 332 \text{ L}\cdot\text{mol}^{-1}\cdot\text{cm}^{-1}$ ). Peroxynitrite ( $\text{ONOO}^-$ ) was obtained by the reaction of  $\text{H}_2\text{O}_2$  and  $\text{NaNO}_2$ , and the concentration was determined from the absorption at  $\lambda=302 \text{ nm}$  ( $\epsilon=1670 \text{ L}\cdot\text{mol}^{-1}\cdot\text{cm}^{-1}$ ) in a 0.1 M NaOH. Hydroxyl radical ( $\cdot\text{OH}$ ) was prepared by the classical Fenton reaction between  $\text{H}_2\text{O}_2$  and  $\text{Fe}^{2+}$ .  $^1\text{O}_2$  was generated by reaction between  $\text{H}_2\text{O}_2$  and excessive NaClO, and concentrations of  $\cdot\text{OH}$  determined by  $\text{H}_2\text{O}_2$  concentrations. Other analytes such as  $\text{Na}^+$ ,  $\text{K}^+$ ,  $\text{Mg}^{2+}$ ,  $\text{Ca}^{2+}$ ,  $\text{Cu}^{2+}$ ,  $\text{Fe}^{2+}$ ,  $\text{Fe}^{3+}$ ,  $\text{Zn}^{2+}$ ,  $\text{Br}^-$ ,  $\text{ClO}^-$ ,  $\text{SO}_4^{2-}$ , Cys, Hcy, GSH,  $\text{NO}_2^-$ ,  $\text{H}_2\text{O}_2$ ,  $\text{Na}_2\text{S}$ , NaSH were dissolved in ultrapure water to prepare 10.0 mM stock solutions. All experiments were performed at 37 °C in 10 mM HEPES buffer solution (1 % DMSO, pH = 7.4). The excitation wavelength in all fluorescence spectra is 435 nm.

Using quinine sulfate as a reference compound, the quantum yield was calculated by the following formula:

$$\Phi_u = \Phi_s (F_u/F_s) (A_s/A_u)$$

$\Phi_u$  and  $\Phi_s$  represent the fluorescence quantum yields of **SWJT-23** and quinine sulfate, respectively.  $F_u$  and  $F_s$  were the fluorescence emission peak integral value of **SWJT-23** and

quinine sulfate, respectively.  $A_s$  and  $A_u$  represent the maximum absorbance value of **SWJT-23** and quinine sulfate, respectively.

The test paper was immersed in the DMSO solution containing 100.0  $\mu\text{M}$  of **SWJT-23** for several minutes. Then, take out the test paper and different concentrations (0, 5.0, 10.0, 20.0, 30.0, 50.0  $\mu\text{M}$ ) of HBrO solution were sprayed on the test strip. The fluorescent color change of the test paper can be seen under the 365 nm ultraviolet lamp.

The cytotoxicity of **SWJT-23** on HeLa cells was detected by CCK-8 assay. HeLa cells were seeded at a 96-well culture plates and grown in 5 %  $\text{CO}_2$  at 37 °C for 24 h, then incubated with **SWJT-23** (0, 5.0, 10.0, 15.0, 20.0  $\mu\text{M}$ ) for 24 h. After the incubation, the CCK solution was added into each well, incubated for 2 h at 450 nm ELISA to measure the OD value and calculate the cell viability of each group.

HeLa cells were placed at the bottom of a glass dish and cultured in an incubator at 37 °C for 24 hours. The cells were washed three times with PBS, and the blank group was incubated with **SWJT-23** (10.0  $\mu\text{M}$ ) for 30 min and then imaged. Subsequently, imaging of endogenous HBrO in cells were implemented in two groups. In the first group, cells were incubated with NaBr (100.0  $\mu\text{M}$ ) for 30 min, then these cells were further incubated with **SWJT-23** (10.0  $\mu\text{M}$ ) for 30 min. In the second group, cells were pretreated with  $\text{Br}^-$  (100.0  $\mu\text{M}$ ) and N-acetylcysteine (100.0  $\mu\text{M}$ ) for 30 min, then these cells were loaded with **SWJT-23** (10.0  $\mu\text{M}$ ) for 30 min. In addition, imaging of exogenous HBrO in cells were carried out. Cells were incubated with HBrO (30.0  $\mu\text{M}$ ) for 30 min after preincubation with **SWJT-23** (10.0  $\mu\text{M}$ ) for 30 min. The above cells were washed three times with PBS and imaged under confocal laser scanning microscope.

For colocalization experiments, the cells were divided into three groups, each group of cells were separately co-incubated with **SWJT-23** (10.0  $\mu\text{M}$ ) and Lyso-Tracker Red (50.0 nM) for 30 min. Then the above cells were washed three times with PBS and imaged under confocal laser scanning microscope. The Pearson's coefficients for the three groups of cells were 0.89, 0.92 and 0.95, and the overlap coefficients were 0.90, 0.93 and 0.93 (calculated by Image J).

## 2. Summary of the fluorescent probes for HBrO.

Table S1 Summary of the fluorescent probes for HBrO

| Probe                                                                               | Detection Limit | Response time | Theoretical calculation support | Application in water environment | Application of portable test strips | References |
|-------------------------------------------------------------------------------------|-----------------|---------------|---------------------------------|----------------------------------|-------------------------------------|------------|
| 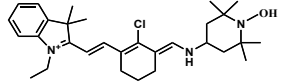   | ND              | 900 s         | ✓                               | --                               | --                                  | 15         |
|    | ND              | 900 s         | ✓                               | --                               | --                                  | 15         |
|   | 0.97 $\mu$ M    | 3.0 min       | ✓                               | --                               | --                                  | 16         |
|  | 30.6 nM         | 30 s          | --                              | --                               | --                                  | 17         |
|  | 17 pM           | 3.0 min       | --                              | --                               | --                                  | 18         |
|  | 20 pM           | 3.0 min       | --                              | --                               | --                                  | 19         |
|  | 1.82 nM         | 30 s          | --                              | --                               | --                                  | 20         |
|  | 99 nM           | 12 s          | --                              | --                               | --                                  | 21         |
|  | 33.5 nM         | Immediately   | ✓                               | --                               | --                                  | 22         |

|                                                                                     |        |         |    |    |      |    |
|-------------------------------------------------------------------------------------|--------|---------|----|----|------|----|
| 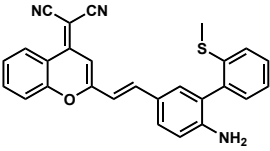   | 660 nM | 8.0 min | -- | -- | --   | 23 |
|    | 92 nM  | 10 s    | -- | -- | --   | 24 |
|    | 240 nM | 4 s     | -- | -- | --   | 25 |
|    | 711 nM | 4 min   | -- | -- | --12 | 26 |
|  | 296 nM | 4 min   | -- | -- | --12 | 26 |
|  | 254 nM | 5 s     | ✓  | -- | --   | 27 |
|  | 200 nM | 1 min   | -- | -- | --   | 28 |

|                                                                                     |         |        |    |    |    |           |
|-------------------------------------------------------------------------------------|---------|--------|----|----|----|-----------|
| 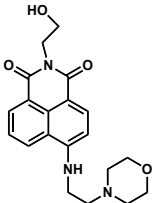   | 15 nM   | 5 s    | ✓  | -- | -- | 29        |
|    | 0.37 μM | --     | -- | -- | -- | 30        |
|    | 11.9 nM | 10 s   | -- | -- | -- | 31        |
|    | 1.37 nM | 4 s    | -- | ✓  | -- | 32        |
|   | 3.8 nM  | 2 s    | -- | -- | -- | 33        |
|  | 3.0 pM  | 5 s    | -- | -- | -- | 34        |
|  | 119 nM  | 10 min | -- | ✓  | -- | 35        |
|  | 1.24 nM | 3 s    | ✓  | ✓  | ✓  | This work |

### 3. Synthesis of SWJT-23.

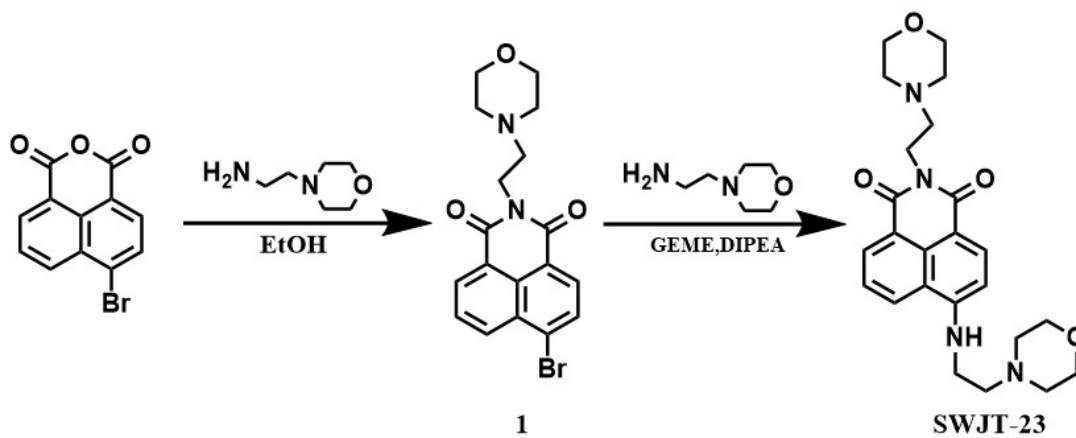

**Scheme S1.** Synthesis of SWJT-23.

#### 4. $^1\text{H}$ , $^{13}\text{C}$ NMR, and MS spectra of SWJT-23.

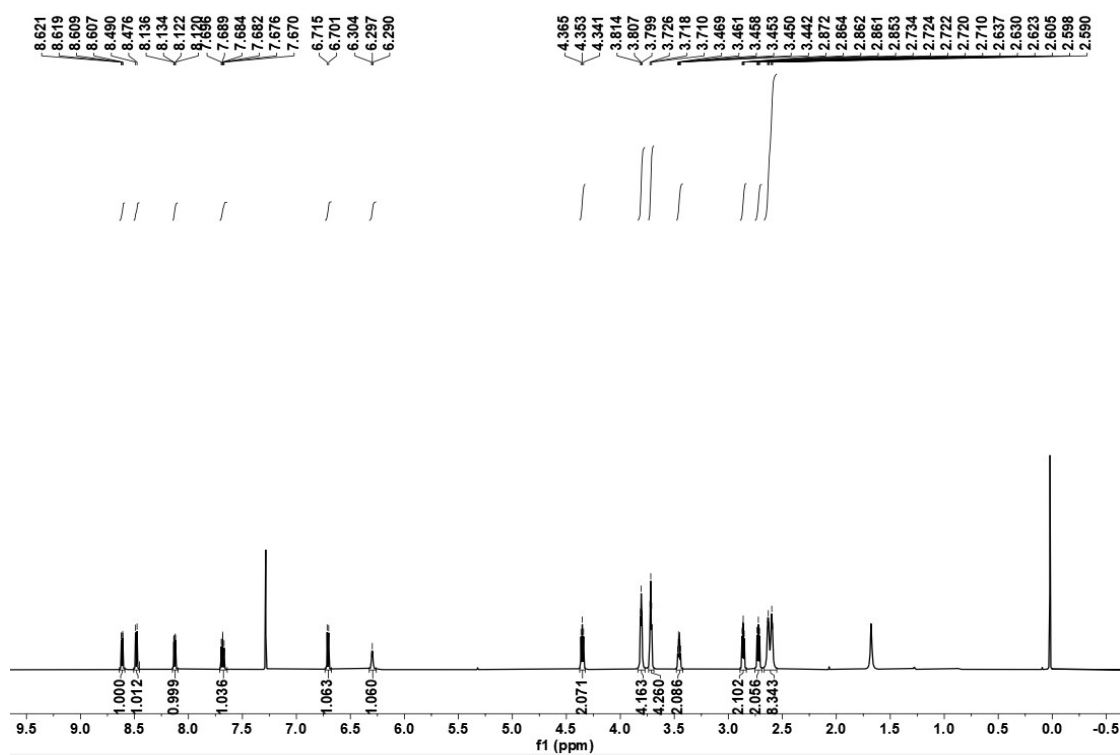

Fig. S1.  $^1\text{H}$  NMR spectrum of SWJT-23 (400 MHz,  $\text{CDCl}_3$ ).

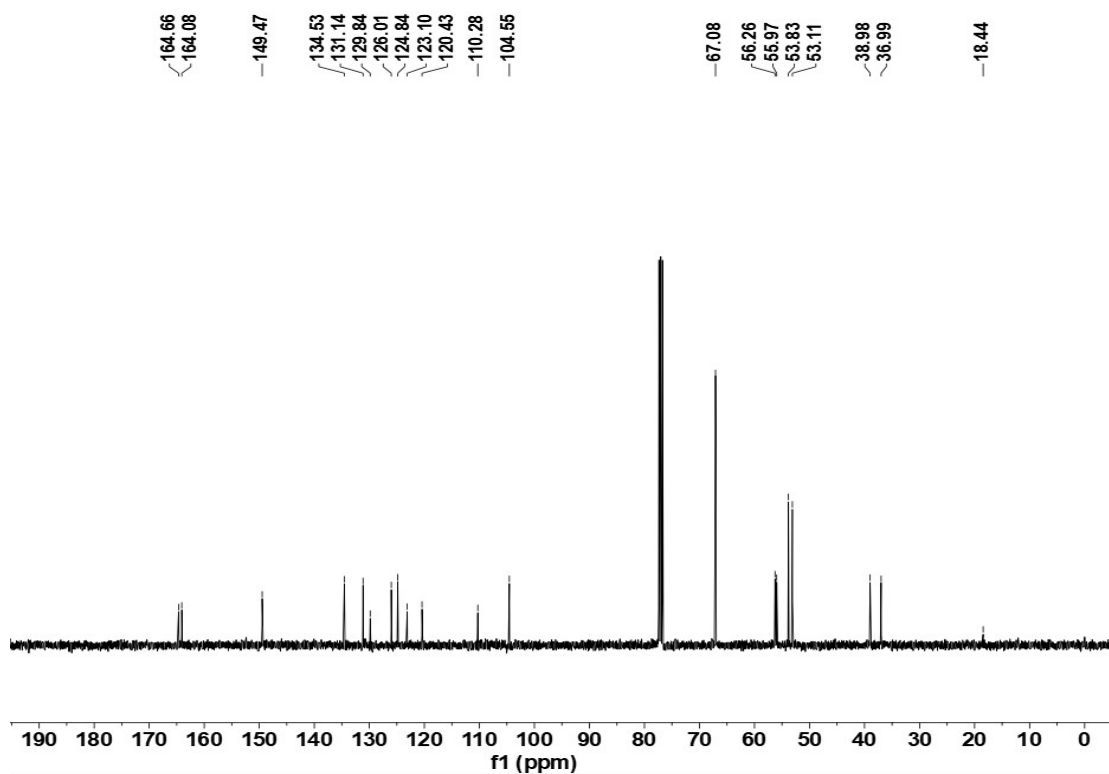

Fig. S2.  $^{13}\text{C}$  NMR spectrum of SWJT-23 (100 MHz,  $\text{CDCl}_3$ ).



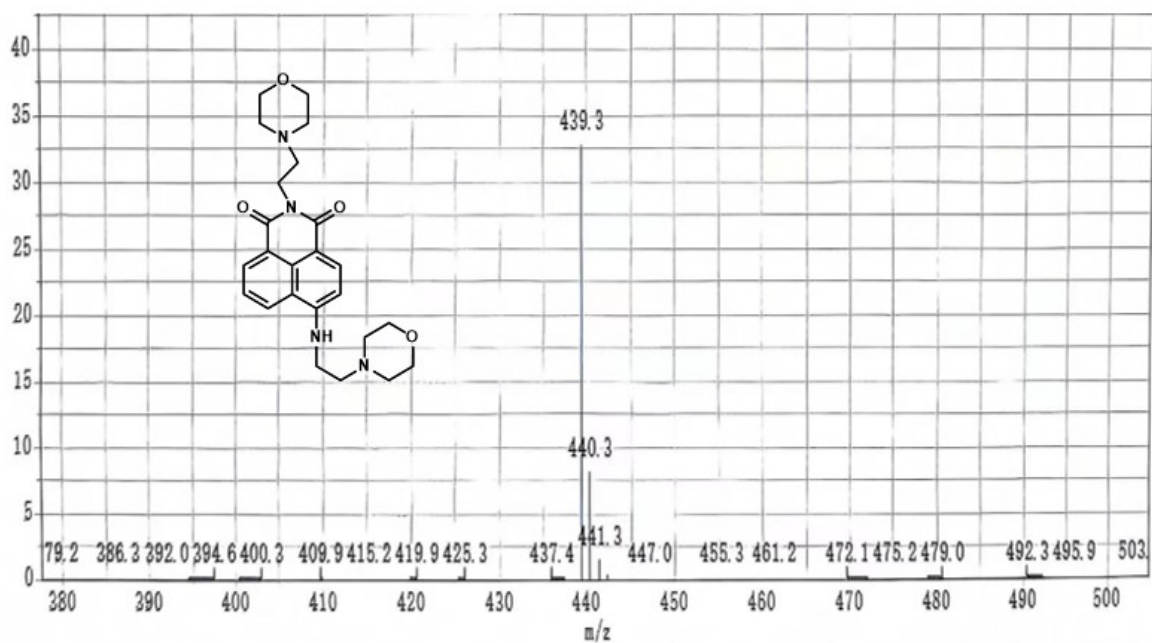

**Fig. S3.** ESI-MS spectrum of SWJT-23.

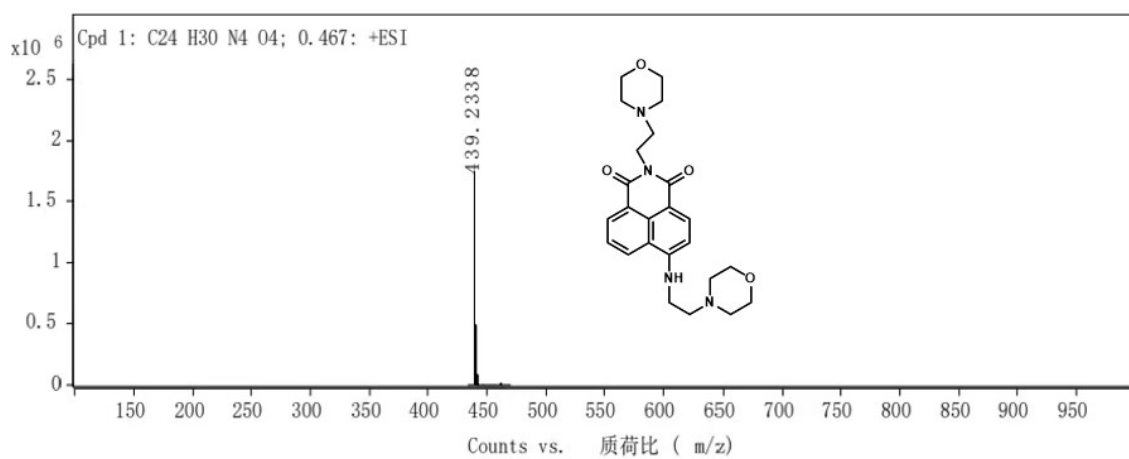

**Fig. S4.** HRMS spectrum of SWJT-23.

5. The pH effect of SWJT-23 and SWJT-23 + HBrO.

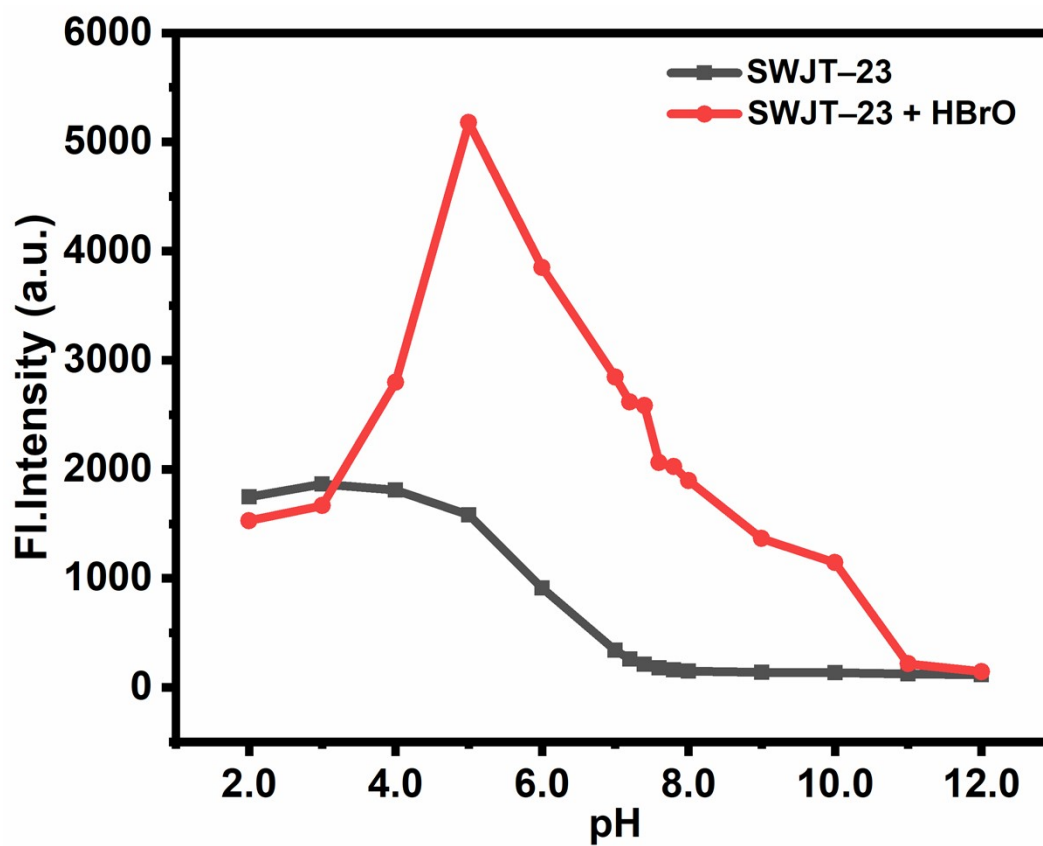

Fig. S5. The pH effect of SWJT-23 and SWJT-23 + HBrO ( $\lambda_{\text{ex}} = 435 \text{ nm}$ ).

6. The stability of SWJT-23 and SWJT-23 +HBrO.

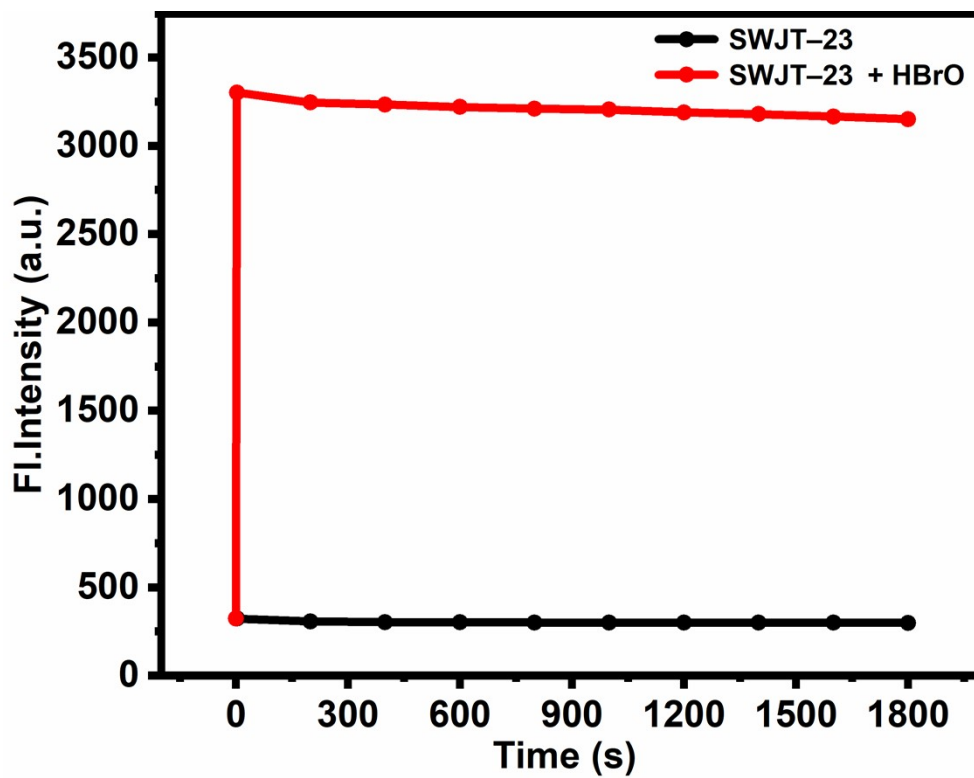

Fig. S6. The stability of SWJT-23 and SWJT-23 +HBrO ( $\lambda_{\text{ex}} = 435 \text{ nm}$ ).

## 7. The detection limit of SWJT-23 to HBrO.

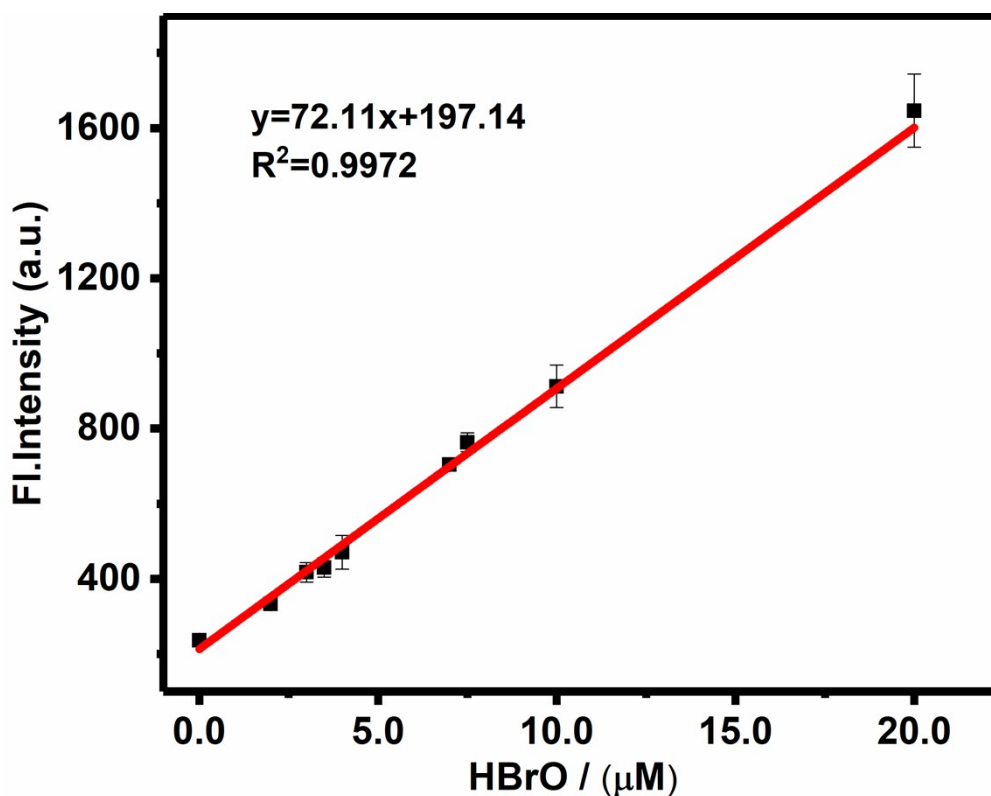

Fig. S7. Linear regression equation of SWJT-23 (10.0 μM) upon the addition of HBrO (0 – 20.0 μM).

The limits of detections (LOD) and limits of quantification (LOQ) of the SWJT-23 for HBrO were determined according to the following equation:

$$DL = K \cdot Sb1 / S.$$

Where K = 3 (LOD) and 10 (LOQ), respectively; Sb1 is the standard deviation of the blank solution; S is the slope of the calibration curve.

$$\text{Linear Equation: } Y = 72.11X + 197.14$$

$$S = 72.11$$

$$Sb1 = 0.03$$

$$LOD = K \cdot Sb1 / S = 1.24 \text{ nM (K=3)}$$

$$LOQ = K \cdot Sb1 / S = 4.16 \text{ nM (K=10)}$$

## 8. ESI-MS spectra of SWJT-HBrO.

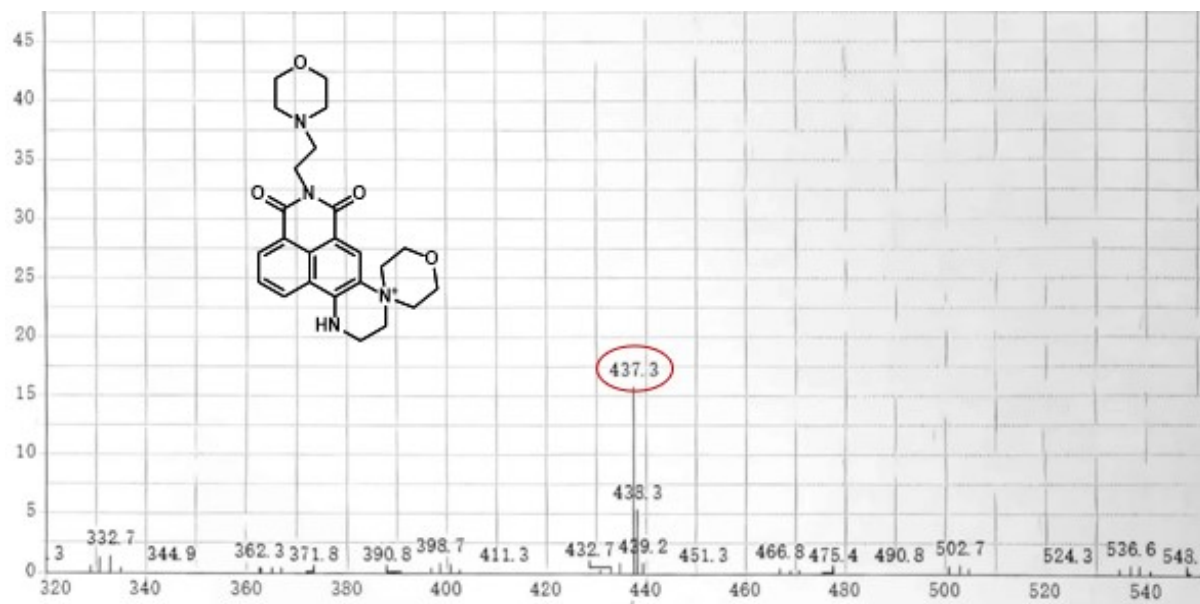

**Fig. S8.** ESI-MS spectrum of SWJT-HBrO.

## 9. Application of SWJT-23 in water samples.

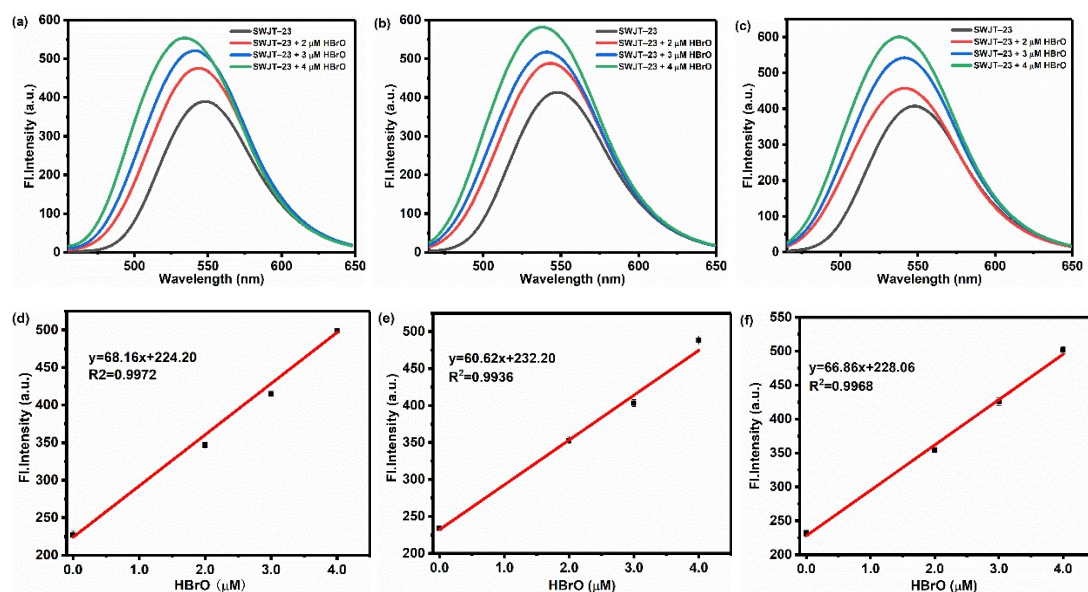

**Fig. S9.** Fluorescence spectra of **SWJT-23** (10.0 μM) spiked with different concentrations of **HBrO** ((2.0 to 4.0 μM) in (a) tap water (b) pool water and (c) lake water; Linear relationships of fluorescence intensities of **SWJT-23** spiked with different concentrations of **HBrO** (2.0 to 4.0 μM) in (d) tap water (e) pool water and (f) lake water.

**10. Cell viability of SWJT-23.**

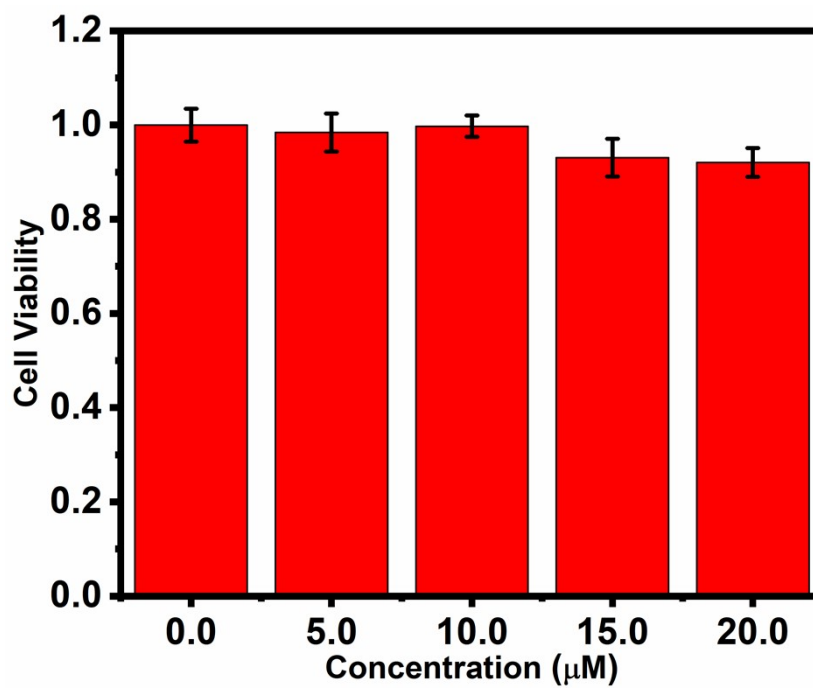

**Fig. S10.** Cytotoxicity of SWJT-23 at different concentrations (0.0, 5.0, 10.0, 15.0, 20.0 µM).
